# Supplementary material for: Quinoline and Quinazoline Alkaloids against COVID-19: An In Silico Multitarget Approach
Source: Hindawi journal article supplement (doi:10.1155/2021/3613268), 2021-03-25
Supplement: f1 [file 3613268.f1.docx]

**SUPPLEMENTARY DATA**

**Supplementary table 1. Virtual screening results of phytochemicals against SARS CoV-2 main protease (PDB ID: 6LU7), human angiotensin converting enzyme 2 (ACE2, PDB ID: IR42) and SARS CoV-2 spike glycoprotein receptor-binding domain (PDB ID: 6LZG)**

| **No.** | **Compounds name** | **Min. Binding energy on Main protease (6LU7; kcal/mol)** | **Min. Binding energy on human ACE2 (IR42; kcal/mol)** | **Min. Binding energy on Spike glycoprotein receptor- binding domain (6LZG; kcal/mol)** |
| --- | --- | --- | --- | --- |
| 1 | Uranidine | -5.9 | -5.5 | -6.5 |
| 2 | 2-Undecyl-4(1H)-quinolone | -5.1 | -5.3 | -6.4 |
| 3 | Buchapine | -5.8 | -6.1 | -6.5 |
| 4 | 𝛾-fagarine | -6.0 | -5.8 | -6.5 |
| 5 | Haplopine | -6.1 | -6.0 | -6.2 |
| 6 | 1-Methyl-2-[6′-(3′′,4′′-methylenedioxyphenyl)hexyl]-4-quinolone | -6.4 | -6.4 | -7.2 |
| 7 | 4-methoxy-  1-methylquinolin-2-one | -5.5 | -5.3 | -5.9 |
| 8 | 2-acetyl-4(3H)-quinazolinone | -5.7 | -6.1 | -6.6 |
| 9 | Sandramycin | -8.7 | -9.4 | -9.9 |
| 10 | Virantmycin | -6.1 | -6.1 | -7.0 |
| 11 | 2-(3,4-methylenedioxyphenylethyl) quinoline | -6.6 | -7.3 | -7.9 |
| 12 | Chimanine D | -5.3 | -5.8 | -6.1 |
| 13 | 2-pentylquinoline | -5.0 | -5.6 | -6.3 |
| 14 | 2-n-propylquinoline | -4.8 | -5.5 | -6.3 |
| 15 | Luzopeptins A | -6.7 | -4.9 | -9.0 |
| 16 | Luzopeptins B | -7.2 | -6.7 | -9.2 |
| 17 | Luzopeptins C | -8.2 | -6.6 | -9.8 |
| 18 | Chimanine B | -5.0 | -5.7 | -6.6 |
| 18 | 4-Methoxy-2phenylquinoline | -6.1 | -6.7 | -7.0 |
| 20 | Cuspareine | -6.2 | -7.2 | -7.1 |
| 21 | Galipeine | -6.5 | -6.7 | -7.1 |
| 22 | Galipinine | -6.5 | -7.1 | -7.8 |
| 23 | Angustureine | -5.2 | -5.4 | -6.2 |
| 24 | Lepadin D | -5.3 | -5.9 | -6.4 |
| 25 | Lepadin E | -5.6 | -6.6 | -7.2 |
| 26 | Lepadin F | -5.0 | -6.7 | -6.6 |
| 27 | Acronycidine | -6.2 | -6.0 | -6.0 |
| 28 | Acronydine | -6.3 | -7.0 | -7.1 |
| 29 | Veprisine | -7.0 | -6.0 | -6.8 |
| 30 | N-methylpreskimmianine | -6.1 | -6.1 | -6.4 |
| 31 | 2-Nonyl-4(1H)-quinolone | -5.5 | -5.6 | -6.6 |
| 32 | 2-(Undec-1-enyl)quinolin-  4(1H)-one | -5.0 | -5.4 | -6.6 |
| 33 | Isofebrifugine | -6.8 | -6.8 | -8.0 |
| 34 | 2-Methoxyrutaecarpine | -7.3 | -7.7 | -8.2 |
| 35 | 2-methoxy-13- methylrutaecarpine | -7.3 | -7.8 | -7.8 |
| 36 | Tryptanthrin | -7.3 | -7.0 | -7.3 |
| 37 | Skimmianine | -6.1 | -5.9 | -5.9 |
| 38 | Kokusaginine | -6.2 | -6.0 | -6.2 |
| 39 | Nitidine | -6.9 | -8.1 | -6.8 |
| 40 | Evoxine | -6.7 | -7.3 | -5.4 |
| 41 | Aplidiopsamine A | -7.5 | -8.4 | -7.3 |
| 42 | Ascidiathiazone A | -7.4 | -7.6 | -6.7 |
| 43 | 2-n-octyl-4-hydroxyquinoline | -5.4 | -6.8 | -5.8 |
| 44 | 2-n-nonyl-4- hydroxyquinoline | -5.6 | -6.5 | -5.8 |
| 45 | 2-n-undecyl-4-hydroxyquinoline | -5.2 | -6.8 | -5.5 |
| 46 | 2-(E)-non-1′-enyl-4-hydroxyquinoline | -5.8 | -6.8 | -6.0 |
| 47 | n-heptyl- 4-hydroxyquinoline N-oxide | -5.6 | -6.6 | -5.3 |
| 48 | 2-n-nonyl-4-hydroxyquinoline N-oxide | -5.5 | -6.5 | -5.9 |
| 49 | 2-((Z)-undec-4′-enyl)- 4-hydroxyquinoline | -5.5 | -6.6 | -5.7 |
| 50 | 2-(3′-(2′-hexylcyclopropyl)propyl)-4-hydroxyquinoline | -5.6 | -7.1 | -5.9 |
| 51 | 2-n-octyl-4-hydroxyquinoline N-oxide | -5.4 | -6.7 | -5.9 |
| 52 | 2-((Z)-undec-4′-enyl)-4-hydroxyquinoline N-oxide | -5.9 | -7.0 | -6.2 |
| 53 | 3-n-heptyl-3- hydroxyquinoline-2,4(1H,3H)-dion | -6.1 | -6.9 | -5.6 |
| 54 | neosartoryadine A | -7.7 | -10.1 | -8.2 |
| 55 | Neosartoryadine B | -7.4 | -9.9 | -7.18 |
| 56 | Oxoglyantrypine | -8.4 | -9.7 | -7.26 |
| 57 | Norquinadoline A | -7.7 | -10.1 | -7.6 |
| 58 | Deoxynortryptoquivaline | -7.2 | -9.6 | -7.6 |
| 59 | quinadoline B | -8.9 | -9.9 |  |
| 60 | Trytoquivaline, quinadoline A | -9.1 | -10.8 | -8.1 |
| 61 | 3-hydroglyantrypine | -8.1 | -8.8 | -7.3 |
| 62 | Cladoquinazoline | -7.7 | -9.1 | -6.84 |
| 63 | epi-cladoquinazoline | -7.7 | -8.5 | -7.15 |
| 64 | Glyantrypine | -7.9 | -8.8 | -7.26 |
| 65 | Deoxytrytoquivaline | -7.3 | -8.8 | -6.2 |
| 66 | Prelapatine B | -8.0 | -9.5 | -7.0 |
| 67 | 3-(3-methylbut-2-enyl)-4-(3-methylbut-2-enyloxy)quinolin-2-ol | -6.5 | -7.8 | -5.7 |
| 68 | Trigonoine B | -7.9 | -8.5 | -6.7 |
| 69 | Waltherione A | -6.9 | -7.5 | -7.8 |
| 70 | Waltherione C | -7.5 | -8.1 | -7.2 |
| 71 | Pseudane IX | -4.9 | -6.6 | -5.7 |
| **Standards** | | | | |
| 76 | Nelfinavir | -6.7 | - | -9.1 |
| 77 | Lisinopril | - | -7.2 | - |

**Supplementary table 2. Toxicity risks and drug- likeliness predicted by OSIRIS Property Explorer**

| **No.** | **Compound name** | **ME** | **TE** | **IE** | **RE** | **DL** | **DS** |
| --- | --- | --- | --- | --- | --- | --- | --- |
| 1 | Uranidine | - | - | - | - | 0.50 | 0.78 |
| 2 | 2-Undecyl-4(1H)-quinolone | - | - | - | - | -15.48 | 0.2 |
| 3 | Buchapine | - | - | - | - | -1.57 | 0.39 |
| 4 | 𝛾-fagarine | +++ | +++ | - | - | -1.27 | 0.17 |
| 5 | Haplopine | +++ | +++ | - | - | -1.38 | 0.18 |
| 6 | 1-Methyl-2-[6′-(3′′,4′′-methylenedioxyphenyl)hexyl]-4-quinolone | - | - | - | - | -0.86 | 0.55 |
| 7 | 4-methoxy-  1-methylquinolin-2-one | - | - | - | - | 1.90 | 0.89 |
| 8 | 2-acetyl-4(3H)-quinazolinone | - | - | - | - | 3.11 | 0.94 |
| 9 | Sandramycin | - | - | - | - | 5.66 | 0.45 |
| 10 | Virantmycin | +++ | - | - | - | -4.27 | 0.21 |
| 11 | 2-(3,4-methylenedioxyphenylethyl) quinoline | - | - | - | - | -1.07 | 0.39 |
| 12 | Chimanine D | - | - | - | - | -0.28 | 0.66 |
| 13 | 2-pentylquinoline | - | - | - | - | -11.93 | 0.38 |
| 14 | 2-n-propylquinoline | - | - | - | - | -4.24 | 0.43 |
| 15 | Luzopeptins A | - | - | - | - | 9.26 | 0.47 |
| 16 | Luzopeptins B | - | - | - | - | 9.54 | 0.48 |
| 17 | Luzopeptins C | - | - | - | - | 9.03 | 0.48 |
| 18 | Chimanine B | - | - | - | - | -3.94 | 0.44 |
| 19 | 4-Methoxy-2phenylquinoline | - | - | - | - | -1.47 | 0.45 |
| 20 | Cuspareine | - | - | - | - | 4.79 | 0.69 |
| 21 | Galipeine | - | - | - | - | 3.54 | 0.79 |
| 22 | Galipinine | - | - | - | - | 2.45 | 0.59 |
| 23 | Angustureine | - | - | - | - | -6.80 | 0.37 |
| 24 | Lepadin D | - | - | - | - | -3.59 | 0.39 |
| 25 | Lepadin E | - | - | - | - | -17.60 | 0.17 |
| 26 | Lepadin F | - | - | - | - | -17.60 | 0.17 |
| 27 | Acronycidine | +++ | +++ | - | - | -1.78 | 0.16 |
| 28 | Acronydine | - | - | - | - | 2.76 | 0.86 |
| 29 | Veprisine | - | - | - | - | 2.76 | 0.86 |
| 30 | N-methylpreskimmianine | - | - | - | +++ | 4.31 | 0.49 |
| 31 | 2-Nonyl-4(1H)-quinolone | - | - | - | - | -15.48 | 0.26 |
| 32 | 2-(Undec-1-enyl)quinolin-  4(1H)-one | - | - | - | - | -19.85 | 0.22 |
| 33 | Isofebrifugine | - | - | - | - | 4.19 | 0.91 |
| 34 | 2-Methoxyrutaecarpine | - | - | - | - | 5.25 | 0.8 |
| 35 | 2-methoxy-13- methylrutaecarpine | - | - | - | - | 6.09 | 0.81 |
| 36 | Tryptanthrin | - | - | - | - | 3.28 | 0.84 |
| 37 | Skimmianine | +++ | +++ | - | - | -0.66 | 0.19 |
| 38 | Kokusaginine | +++ | - | - | - | -5.70 | 0.32 |
| 39 | Nitidine | +++ | +++ | - | - | 3.85 | 0.18 |
| 40 | Evoxine | +++ | +++ | - | ++ | -1.80 | 0.12 |
| 41 | Aplidiopsamine A | - | - | - | - | -3.62 | 0.42 |
| 42 | Ascidiathiazone A | +++ | - | - | ++ | -0.78 | 0.29 |
| 43 | 2-n-octyl-4-hydroxyquinoline | - | - | - | - | -21.46 | 0.22 |
| 44 | 2-n-nonyl-4- hydroxyquinoline | - | - | - | - | -19.79 | 0.27 |
| 45 | 2-n-undecyl-4-hydroxyquinoline | - | - | - | - | -19.79 | 0.21 |
| 46 | 2-(E)-non-1′-enyl-4-hydroxyquinoline | - | - | - | - | -23.57 | 0.27 |
| 47 | n-heptyl- 4-hydroxyquinoline N-oxide | - | - | - | - | -20.26 | 0.29 |
| 48 | 2-n-nonyl-4-hydroxyquinoline N-oxide | - | - | - | - | -20.26 | 0.26 |
| 49 | 2-((Z)-undec-4′-enyl)- 4-hydroxyquinoline | - | - | - | - | -20.7 | 0.23 |
| 50 | 2-(3′-(2′-hexylcyclopropyl)propyl)-4-hydroxyquinoline | - | - | - | - | -15.43 | 0.22 |
| 51 | 2-n-octyl-4-hydroxyquinoline N-oxide | - | - | - | - | -21.46 | 0.22 |
| 52 | 2-((Z)-undec-4′-enyl)-4-hydroxyquinoline N-oxide | - | - | - | - | -22.26 | 0.17 |
| 53 | 3-n-heptyl-3- hydroxyquinoline-2,4(1H,3H)-dione | - | - | - | - | -22.29 | 0.17 |
| 54 | Neosartoryadine A | - | - | - | - | 3.32 | 0.71 |
| 55 | Neosartoryadine B | - | - | - | - | 1.15 | 0.63 |
| 56 | Oxoglyantrypine | - | - | - | - | 4.00 | 0.87 |
| 57 | Norquinadoline A | - | - | - | - | 7.04 | 0.74 |
| 58 | Deoxynortryptoquivaline | - | - | - | - | 4.44 | 0.66 |
| 59 | Quinadoline B | - | - | +++ | - | 6.92 | 0.48 |
| 60 | Quinadoline A | - | - | - | - | 7.19 | 0.72 |
| 61 | 3-hydroglyantrypine | - | - | - | - | 4.2 | 0.89 |
| 62 | Cladoquinazoline | - | - | - | - | 3.91 | 0.82 |
| 63 | epi-cladoquinazoline | - | - | - | - | 3.91 | 0.82 |
| 64 | Glyantrypine | - | - | - | - | 3.84 | 0.89 |
| 65 | Deoxytrytoquivaline | - | - | - | - | 5.93 | 0.58 |
| 66 | Prelapatine B | - | - | - | - | 3.72 | 0.88 |
| 67 | 3-(3-methylbut-2-enyl)-4-(3-methylbut-2-enyloxy)quinolin-2-ol | - | - | - | - | -1.9 | 0.31 |
| 68 | Trigonoine B | - | - | - | - | 3.52 | 0.49 |
| 69 | Waltherione A | - | - | - | - | -0.01 | 0.54 |
| 70 | waltherione C | - | - | - | - | -1.87 | 0.38 |
| 71 | Pseudane IX | - | - | - | - | -19.79 | 0.27 |

ME: mutagenic effect, TE: tumorigenic effect, IE: irritant effect, RE: reproductive effect, DL: drug likeliness, DS: drug score, (+++): high risk, (++): medium risk, (-): no risk.
